# Supplementary material
Source: PubMed Central journal article supplement (PMC4476283)
Supplement: NIHMS696465-supplement-1.pdf [file NIHMS696465-supplement-1.pdf]

## Supplemental Material

**Figure S1.** Root mean square deviation (RMSD) for the molecular dynamics simulation of OXA-24/40 (WT) and OXA-160 (OXA-24/40 P227S).

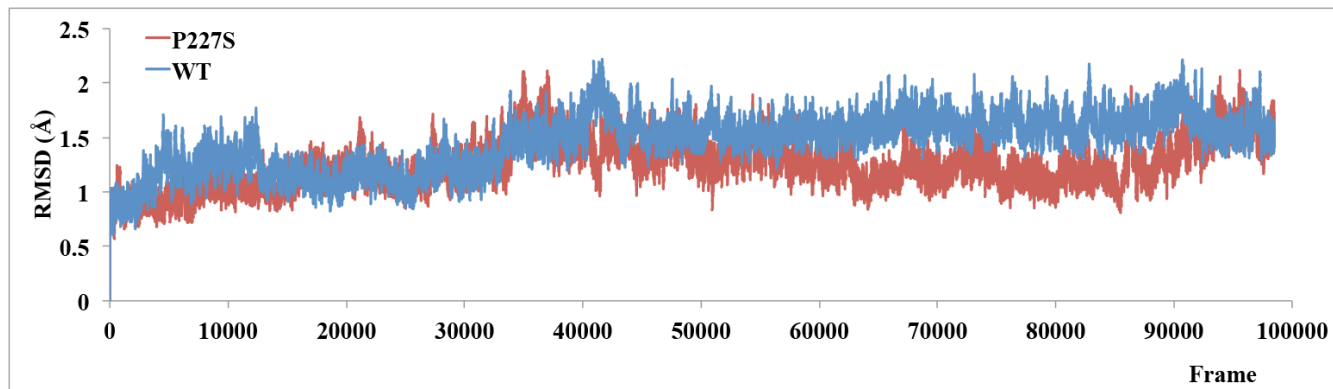

**Figure S2.** Post-acylation rearrangement of ceftazidime. After ceftazidime forms an acyl intermediate with the nucleophilic serine of the enzyme (left panel), the dihydrothiazine ring rearranges electronically causing the removal of a pyridine group from its R2 side-chain (right panel).

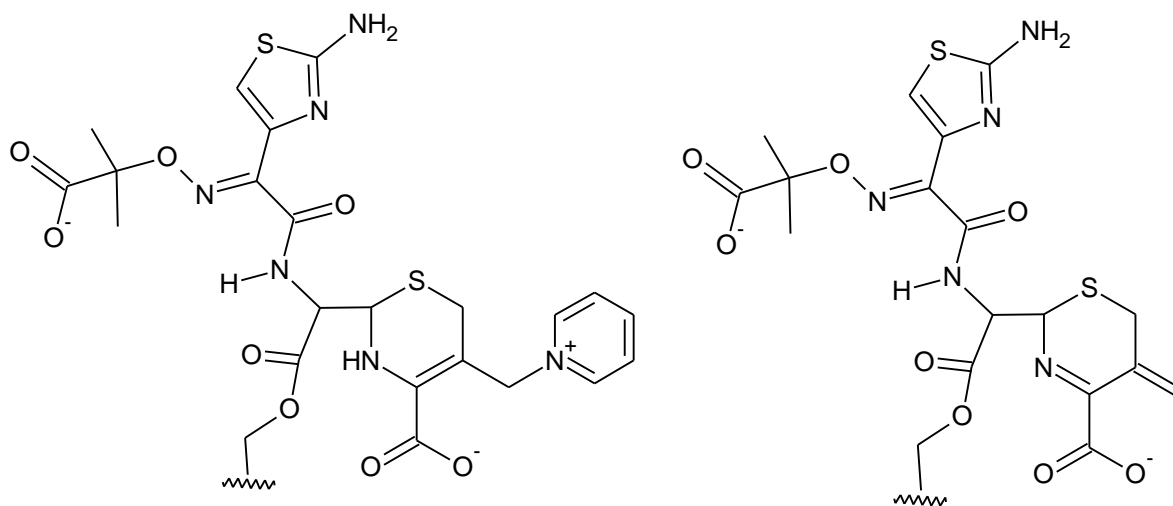

**Figure S3.** Upper panel:  $C\alpha$  root mean squared fluctuations (RMSF) difference between OXA-24/40 and OXA-160 enzymes. Lower panel: Plot of areas where fluctuations differ most from normal, with blue indicating decrease in fluctuations in OXA-160 (OXA-24/40 P227S) compared to the OXA-24/40 WT. Red segments denote increased fluctuations for the P227S mutant.

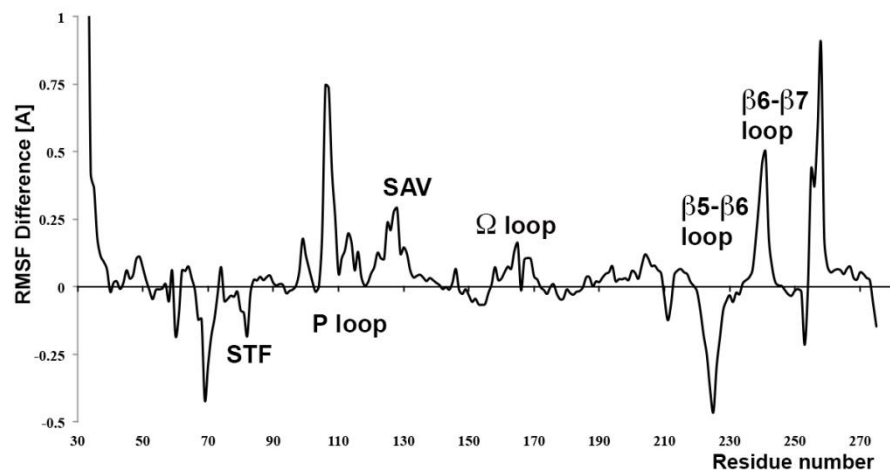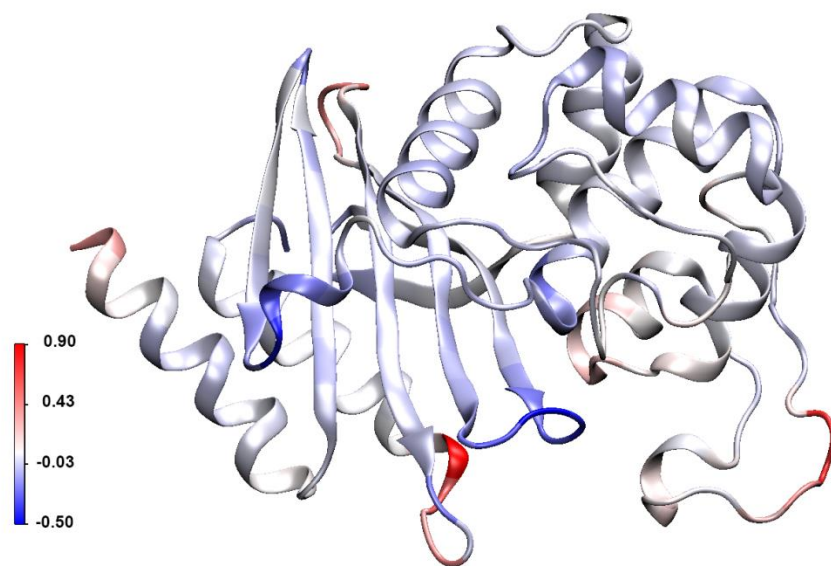

**Supplementary Data:** CHARMM force-field parameters for carboxylated lysine. Carboxylated lysine CHARMM topology and charges (N. Simakov and T. Wymore, manuscript in preparation)

```

PRES KCX -1.00 ! Patch for carboxylated lysine, ns
GROUP
ATOM CE CT2 0.060
ATOM HE1 HA 0.090
ATOM HE2 HA 0.090
ATOM NZ NECA -0.810
ATOM HZ1 H 0.300
ATOM CX CC 0.690
ATOM OQ1 OC -0.710
ATOM OQ2 OC -0.710
DELETE ATOM HZ2
DELETE ATOM HZ3
BOND NZ CX
BOND CX OQ1
BOND CX OQ2
IMPR CX NZ OQ1 OQ2

```

**Carboxylated lysine CHARMM topology** and charges (N. Simakov and T. Wymore, manuscript in preparation)

**Bond parameters**

```

CT2 NECA 380.00 1.4300 ! ECA/KCX, init from NH1 CT1, fq matched, ns
H NECA 440.00 1.0280 ! ECA/KCX, init from NH1 H, fq matched, ns
CC NECA 320.00 1.4617 ! ECA/KCX, init from NH2 CC/NH1 C, fq matched, ns

```

**Angle parameters**

```

CT3 CT2 NECA 67.70 110.93 ! ECA/KCX, init from NH3 CT2 CT3, fq matched, ns
CT2 CT2 NECA 67.70 110.93 ! ECA/KCX, set to CT3 CT2 NECA, ns
HA CT2 NECA 51.50 107.50 ! ECA/KCX, init from NC2 CT2 HA, fq match ok, ns
CC NECA CT2 50.00 115.00 ! ECA/KCX, init from CT2 NH1 C, fq matched, ns
CT2 NECA H 60.00 110.00 ! ECA/KCX, init from H NH1 CT1, fq match ok, ns
CC NECA H 60.00 110.00 ! ECA/KCX, init from H NH1 CT2, fq match ok, ns
NECA CC OC 80.00 110.00 ! ECA/KCX, init from O C NH1, fq match ok, ns

```

**Torsional parameters**

```

HA CT2 CT3 HA 0.1600 3 0.00 ! ECA/KCX, init from X CT2 CT3 X, ns
HA CT3 CT2 NECA 0.0400 3 0.00 ! ECA/KCX, init from HA CT3 CT2 CA, fq
matched, ns
CC NECA CT2 CT3 1.1000 1 180.00 ! ECA/KCX, Set from ParamIt:dihfit, ns
CC NECA CT2 CT3 0.2000 3 0.00 ! ECA/KCX, Set from ParamIt:dihfit, ns
CC NECA CT2 CT2 1.1000 1 180.00 ! ECA/KCX, Set from ParamIt:dihfit, ns
CC NECA CT2 CT2 0.2000 3 0.00 ! ECA/KCX, Set from ParamIt:dihfit, ns

```

|                                                              |          |           |          |                          |   |        |                                        |                         |      |       |        |
|--------------------------------------------------------------|----------|-----------|----------|--------------------------|---|--------|----------------------------------------|-------------------------|------|-------|--------|
| H                                                            | NECA     | CT2       | HA       | 0.0000                   | 1 | 0.00   | ! ECA/KCX, init from HA                | CT3                     | NH1  | H, ns |        |
| CC                                                           | NECA     | CT2       | HA       | 0.0000                   | 1 | 0.00   | ! ECA/KCX, init from HA                | CT2                     | NH1  | C, ns |        |
| CT2                                                          | NECA     | CC        | OC       | 2.2000                   | 2 | 180.00 | ! ECA/KCX, Set from ParamIt:dihfit, ns |                         |      |       |        |
| CT3                                                          | CT2      | NECA      | H        | 0.2000                   | 3 | 0.00   | ! ECA/KCX, Set from ParamIt:dihfit, ns |                         |      |       |        |
| CT2                                                          | CT2      | NECA      | H        | 0.2000                   | 3 | 0.00   | ! ECA/KCX, Set to CT3                  | CT2                     | NECA | H, ns |        |
| H                                                            | NECA     | CC        | OC       | 1.9250                   | 2 | 180.00 | ! ECA/KCX, Set from ParamIt:dihfit, ns |                         |      |       |        |
| <b>Improper</b>                                              |          |           |          |                          |   |        |                                        |                         |      |       |        |
| CC                                                           | NECA     | OC        | OC       | 96.0000                  |   | 0      | 0.0000                                 | ! ECA/KCX, init from OC | X    | X     | CC, ns |
| <b>Non-bonded parameters, Lennard-Jones, epsilon, Rmin/2</b> |          |           |          |                          |   |        |                                        |                         |      |       |        |
| NECA                                                         | 0.000000 | -0.200000 | 1.850000 | ! ECA/KCX, N for ECA, ns |   |        |                                        |                         |      |       |        |
